# Supplementary material for: Coronary Microvascular Dysfunction Restored After Surgery in Inflammatory Bowel Disease: A Prospective Observational Study
Source: PubMed Central journal article supplement — J Am Heart Assoc. 2021 Apr 26;10(9):e019125. doi: 10.1161/JAHA.120.019125 (PMC8200729; doi:10.1161/jaha.120.019125), 2021-04-26
Supplement: JAH3-10-e019125-s001.pdf [file JAH3-10-e019125-s001.pdf]

# **Supplemental Material**

**Table S1. Comparisons of baseline characteristics between patients with and without coronary microvascular dysfunction.**

| Variables                          | Non-CMD (n =23) | CMD (n =14) | <i>p</i> -value |
|------------------------------------|-----------------|-------------|-----------------|
| Age, years                         | 41 ± 15         | 51 ± 15     | 0.059           |
| Male, n (%)                        | 12 (52)         | 8 (57)      | 0.769           |
| Disease Duration, years            | 9 (2-15)        | 12 (8-15)   | 0.208           |
| Body mass index, kg/m <sup>2</sup> | 19.7 ± 3.4      | 18.7 ± 3.0  | 0.385           |
| Hypertension, n (%)                | 0 (0)           | 1 (7)       | 0.194           |
| Diabetes mellitus, n (%)           | 1 (4)           | 0 (0)       | 0.429           |
| Dyslipidemia, n (%)                | 1 (4)           | 1 (7)       | 0.715           |
| Laboratory data                    |                 |             |                 |
| White Blood Cells, /μl             | 7852 ± 3813     | 8464 ± 4277 | 0.654           |
| Hemoglobin, g/dl                   | 11.4 ± 2.0      | 11.4 ± 2.2  | 0.954           |
| Hematocrit, %                      | 35.2 ± 5.3      | 34.3 ± 6.1  | 0.629           |
| Platelets, ×10 <sup>4</sup> /μl    | 28.8 ± 7.8      | 30.6 ± 10.4 | 0.556           |
| Serum creatinine, mg/dl            | 0.65 ± 0.19     | 0.73 ± 0.28 | 0.296           |
| Total protein, mg/dl               | 6.1 ± 0.9       | 6.4 ± 1.0   | 0.344           |
| Albumin, mg/dl                     | 3.2 ± 0.9       | 3.1 ± 0.8   | 0.541           |
| Total cholesterol, mg/dl           | 145 ± 46        | 143 ± 48    | 0.901           |
| HDL cholesterol, mg/dl             | 41 ± 18         | 44 ± 21     | 0.664           |
| LDL cholesterol, mg/dl             | 85 ± 38         | 78 ± 29     | 0.581           |

|                       |                  |                  |       |
|-----------------------|------------------|------------------|-------|
| Triglyceride, mg/dl   | 101 ± 55         | 103 ± 41         | 0.925 |
| hs-CRP, ng/ml         | 712 (290-6030)   | 5145 (775-22975) | 0.147 |
| IL-6, pg/ml           | 4.5 (1.6–9.0)    | 10.7 (4.2–21.3)  | 0.042 |
| TNF- $\alpha$ , pg/ml | 2.25 (1.03–4.38) | 4.95 (1.40–8.84) | 0.175 |

---

Values are mean  $\pm$  SD or number of patients (%). HDL, high density lipoprotein; LDL, low density lipoprotein; hs-CRP, high-sensitivity C-reactive protein; IL, interleukin; TNF, tumor necrosis factor.

**Table S2. Comparisons of baseline echocardiographic parameters between patients with and without coronary microvascular dysfunction.**

| Variables                | Non-CMD (n =23) | CMD (n =14)  | <i>p</i> -value |
|--------------------------|-----------------|--------------|-----------------|
| IVS thickness, cm        | 7.9 ± 1.9       | 8.5 ± 1.4    | 0.361           |
| PW thickness, cm         | 8.2 ± 1.4       | 8.3 ± 1.2    | 0.774           |
| LVDd, cm                 | 45.7 ± 4.8      | 45.6 ± 4.0   | 0.936           |
| LVDs, cm                 | 28.7 ± 4.0      | 28.0 ± 2.9   | 0.599           |
| Fractional shortening, % | 39.0 ± 5.5      | 39.0 ± 3.5   | 0.963           |
| Left atrial diameter, cm | 31.2 ± 4.8      | 30.6 ± 5.4   | 0.738           |
| Mitral E-wave, cm/s      | 70.0 ± 18.1     | 71.9 ± 19.4  | 0.775           |
| Mitral A-wave, cm/s      | 53.9 ± 15.1     | 61.5 ± 17.5  | 0.207           |
| E/A ratio                | 1.4 ± 0.5       | 1.2 ± 0.5    | 0.461           |
| Septal e', cm/s          | 9.5 ± 3.2       | 8.6 ± 3.3    | 0.389           |
| E/e' septal              | 8.0 ± 2.8       | 8.9 ± 3.3    | 0.255           |
| Dct, ms                  | 199.9 ± 35.9    | 209.4 ± 47.1 | 0.527           |

Values are mean ± SD. IVS, interventricular septum; PW, posterior wall; LVDd, left ventricular end-diastolic diameter; LVDs, left ventricular end-systolic diameter; FS, fractional shortening; Dct, deceleration time of the mitral E-wave velocity.

**Table S3. Comparisons of patient characteristics and treatment between patients with and without coronary microvascular dysfunction in Crohn's disease and Ulcerative colitis.**

| Variables                   | CD        | CD         | UC       | UC        | <i>p</i> -value |
|-----------------------------|-----------|------------|----------|-----------|-----------------|
|                             | Non-CMD   | CMD        | Non-CMD  | CMD       |                 |
|                             | (n =13)   | (n =9)     | (n =10)  | (n =5)    |                 |
| Age, years                  | 37 ± 14   | 42 ± 10    | 45 ± 15  | 65 ± 10*  | 0.008           |
| Male, %                     | 46        | 78         | 60       | 20        | 0.184           |
| Disease Duration, years     | 11 (3-14) | 12 (10-15) | 2 (1-13) | 11 (6-12) | 0.273           |
| CDAI                        | 248 ± 71  | 240 ± 87   | -        | -         | 0.850           |
| UCDAI                       | -         | -          | 9 ± 2    | 9 ± 2     | 1.000           |
| Disease activity at surgery |           |            |          |           | 0.228           |
| Mild, %                     | 31        | 44         | 0        | 0         |                 |
| Moderate, %                 | 46        | 44         | 60       | 60        |                 |
| Severe, %                   | 23        | 12         | 40       | 40        |                 |
| Location of lesion          |           |            |          |           | -               |
| Ileum, %                    | 46        | 56         | -        | -         | 0.665           |
| Colon, %                    | 31        | 22         | -        | -         | 0.658           |
| Ileocolonic region, %       | 23        | 22         | -        | -         | 0.962           |
| Total colon, %              | -         | -          | 70       | 80        | 0.699           |
| Left-sided colon, %         | -         | -          | 30       | 20        | 0.699           |
| Medications                 |           |            |          |           |                 |

|                            |    |    |     |       |       |
|----------------------------|----|----|-----|-------|-------|
| TNF- $\alpha$ Inhibitor, % | 62 | 67 | 40  | 20    | 0.276 |
| 5-aminosalicylic acid, %   | 77 | 89 | 60  | 0*†‡  | 0.006 |
| Steroid, %                 | 15 | 0  | 50† | 0     | 0.022 |
| Immunosuppressants, %      | 8  | 0  | 0   | 60*†‡ | 0.002 |
| Surgical procedure         |    |    |     |       | -     |
| Small bowel resection, %   | 15 | 33 | -   | -     | 0.323 |
| Ileocecal resection, %     | 39 | 45 | -   | -     | 0.604 |
| Colonic resection, %       | 46 | 22 | -   | -     | 0.251 |
| Subtotal colectomy, %      | -  | -  | 50  | 20    | 0.264 |
| Total proctocolectomy, %   | -  | -  | 50  | 80    | 0.264 |

Values are mean  $\pm$  SD, median and interquartile range or percentage. CD, crohn's disease; UC, ulcerative colitis, CMD, coronary microvascular dysfunction: CDAI, Crohn's Disease Activity Index; UCDAI, Ulcerative Colitis Disease Activity Index; TNF, tumor necrosis factor.

\*:  $p < .05$  versus CD Non-CMD. †:  $p < .05$  versus CD CMD. ‡:  $p < .05$  versus UC Non-CMD.

Figure S1. Comparisons of changes in high-sensitivity C-reactive protein (left) and interleukin-6 (right) between subjects with increased hyperemic coronary flow velocity and those with decreased hyperemic coronary flow velocity among patients with inflammatory bowel disease and non-coronary microvascular dysfunction.

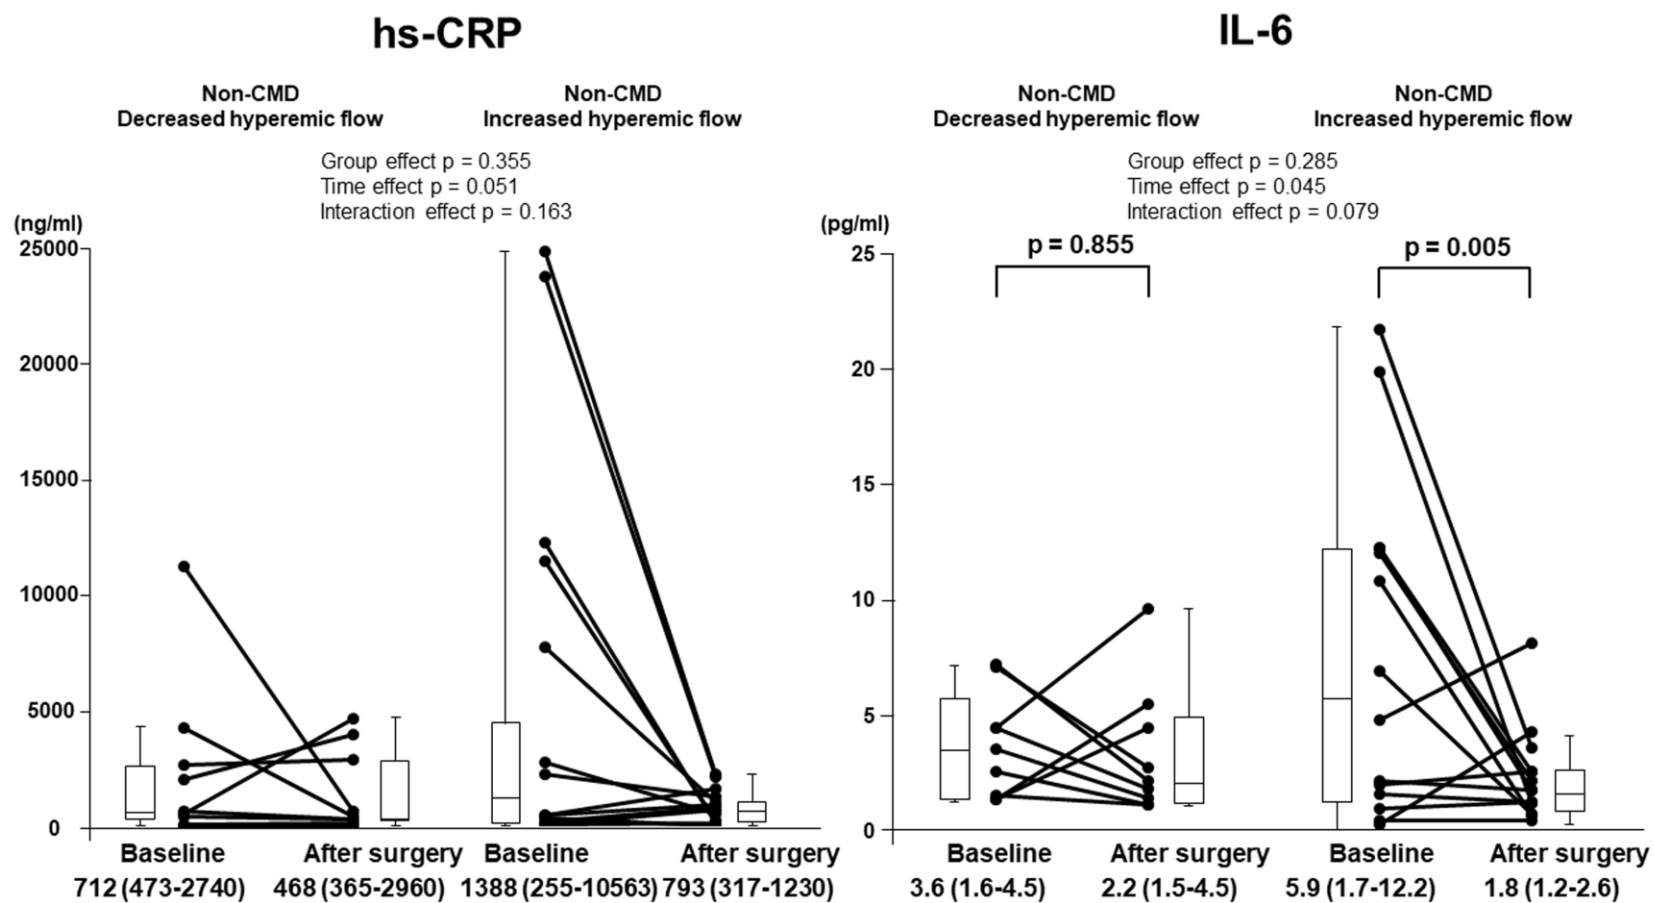

CMD, coronary microvascular dysfunction; hs-CRP, high-sensitivity C-reactive protein; IL-6, interleukin-6.
